# Supplementary material for: Designing Multistimuli-Responsive Anisotropic Bilayer Hydrogel Actuators by Integrating LCST Phase Transition and Photochromic Isomerization
Source: MDPI journal article supplement (doi:10.3390/polym15030786), 2023-02-03
Supplement: s1 [file s1]

# Designing Multistimuli-Responsive Anisotropic Bilayer Hydrogel Actuators by Integrating LCST Phase Transition and Photochromic Isomerization

Shijun Long <sup>1,2</sup>, Jiacheng Huang <sup>1,2</sup>, Jiaqiang Xiong <sup>1,2</sup>, Chang Liu <sup>1,2</sup>, Fan Chen <sup>1,2</sup>, Jie Shen <sup>3,\*</sup>, Yiwan Huang <sup>1,2,\*</sup> and Xuefeng Li <sup>1,2,\*</sup>

<sup>1</sup> Hubei Provincial Key Laboratory of Green Materials for Light Industry, Hubei University of Technology, Wuhan 430068, China

<sup>2</sup> New Materials and Green Manufacturing Talent Introduction and Innovation Demonstration Base, Hubei University of Technology, Wuhan 430068, China

<sup>3</sup> Hubei Research and Design Institute of Chemical Industry, Wuhan 430073, China

\* Correspondence: j\_shen21@163.com (J.S.); yiwanyuan@hbut.edu.cn (Y.H.); li\_xf@mail.hbut.edu.cn (X.L.)

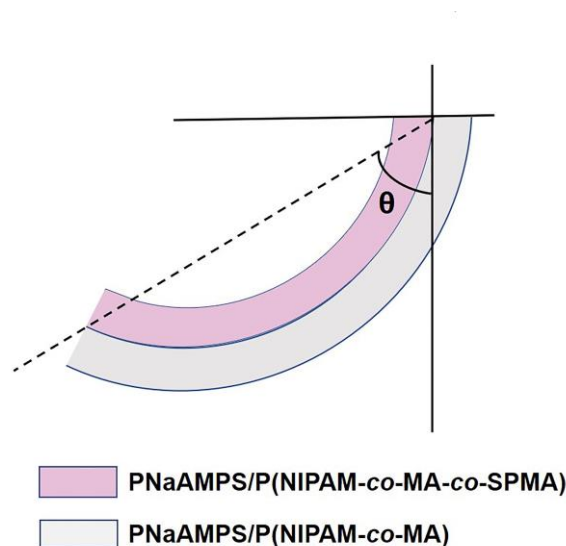

**Figure S1.** The measurement of bending angle for the bilayer hydrogel.

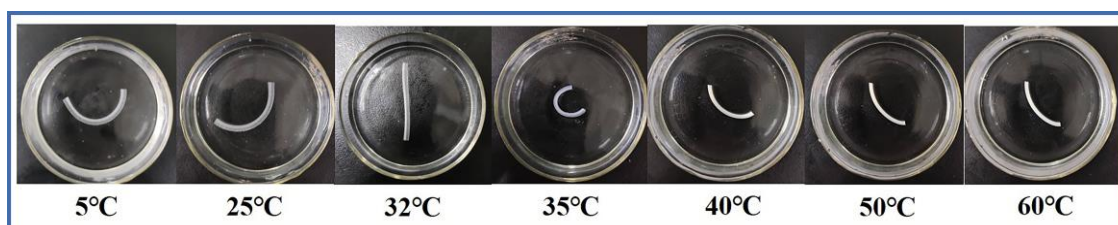

**Figure S2.** Photographs of the corresponding bilayer hydrogels in DI water at different temperatures.

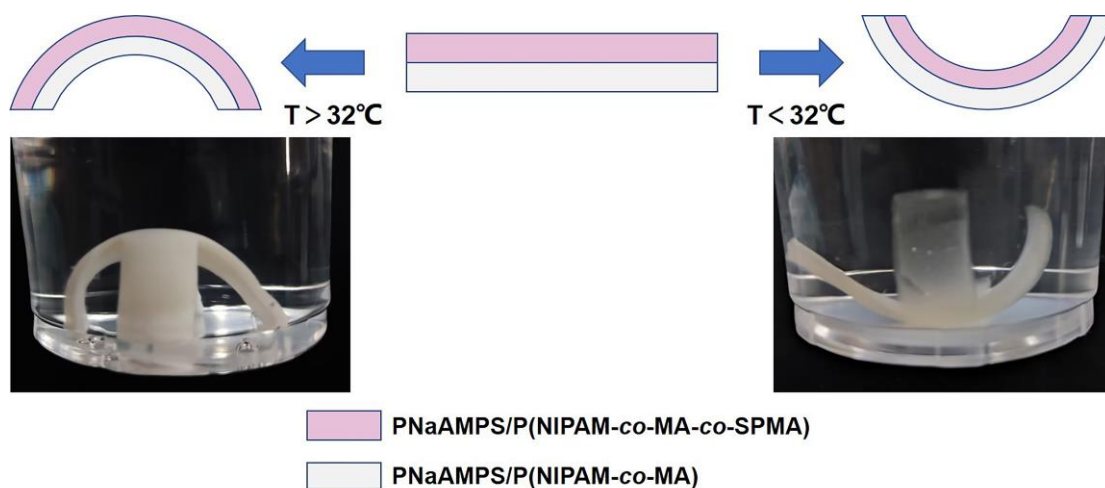

Figure S3. Flowerlike soft actuator based on the bilayer hydrogel.

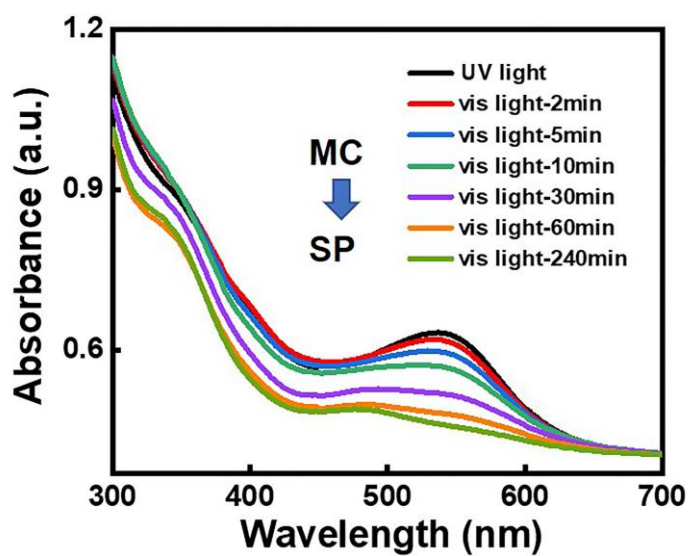

Figure S4. Fading kinetics of PNaAMPS/P(NIPAM-co-MA-co-SPMA) hydrogel.

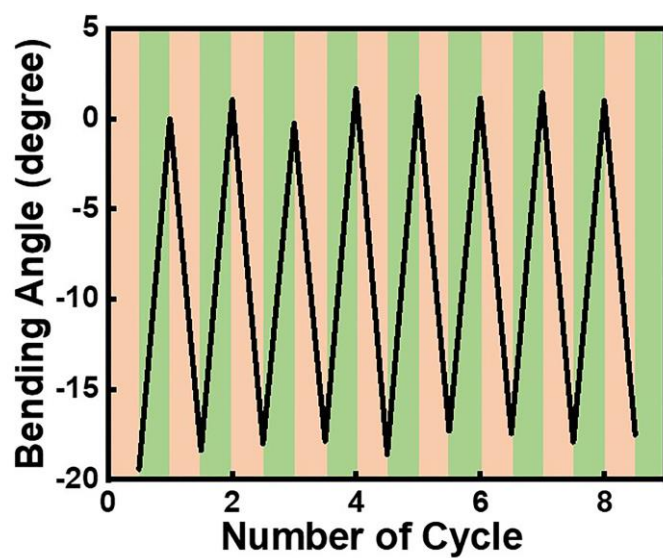

**Figure S5.** Cyclic reversible shape-changing behavior of bilayer hydrogel of the turning on/off of UV light at 32°C in DI water (Green represents the turning off of UV light, pink represents the turning on of UV light).
